# Supplementary material for: Pd/C-catalyzed cross-coupling reaction of benzyloxysilanes with halosilanes for selective synthesis of unsymmetrical siloxanes
Source: Royal Society of Chemistry journal article supplement (doi:10.1039/c4ra02126f), 2014-01-01
Supplement: c4ra02126f1.pdf [file c4ra02126f1.pdf]

Supporting Informations for

Pd/C-Catalyzed Cross-Coupling Reaction of Benzyloxysilanes with Halosilanes for Selective Synthesis  
of Unsymmetrical Siloxanes

Masayasu Igarashi, Keiko Kubo, Tomohiro Matsumoto, Kazuhiko Sato, Wataru Ando and Shigeru  
Shimada\*

National Institute of Advanced Industrial Science and Technology (AIST),  
Tsukuba Central 5, 1-1-1 Higashi, Tsukuba, Ibaraki 305-8565, Japan.

## Experimental

**Caution!** Dried Pd/Cs are potentially flammable in air. Keep the reaction mixture under an inert atmosphere and moisten Pd/Cs with water for safety after the reaction. Ignoring safety precautions can lead to fire!

### Instrumentation and chemicals

$^1\text{H}$  (400 MHz) and  $^{13}\text{C}$  NMR (100 MHz) spectra of benzyloxysilanes were recorded on a JEOL ECX-400P spectrometer using  $\text{CDCl}_3$  as a solvent.  $^{29}\text{Si}$  NMR (79.5 MHz) spectra of benzyloxysilanes were recorded on a JEOL LA500 spectrometer using  $\text{CDCl}_3$  as a solvent.  $^1\text{H}$  (600 MHz),  $^{13}\text{C}$  NMR (151 MHz) and  $^{29}\text{Si}$  NMR (119 MHz) spectra of siloxanes were recorded on a Bruker AVANCEIII spectrometer equipped with a cryoprobe using  $\text{CDCl}_3$  as a solvent. Chemical shifts ( $\delta$ ) are reported in parts per million relative to external standard (tetramethylsilane, 0.00 ppm) for  $^1\text{H}$ ,  $^{13}\text{C}$  and  $^{29}\text{Si}$ . Time-of-flight mass spectra of the products were analyzed on a Bruker micrOTOF II equipped with an ESI probe.

Pd/Cs (ASCA-2, NX and OH types) were obtained from N. E. CHEMCAT Co. Ltd.  $\text{Ph}_2\text{tBuSiCl}$ , anhydrous  $\text{CDCl}_3$  and 1,4-bis(trimethylsilyl)benzene were obtained from Aldrich Chemical Co.  $\text{Et}_3\text{N}$ , super dehydrated  $\text{EtOAc}$ ,  $\text{Na}_2\text{SO}_4$ ,  $\text{Me}_2\text{SiCl}_2$  and  $\text{CH}_2\text{Cl}_2$  were obtained from Wako Pure Chemicals Ind., Ltd.  $\text{Ph}_3\text{SiCl}$ ,  $\text{Ph}_2\text{SiCl}_2$ ,  $\text{PhSiCl}_3$ ,  $\text{MeSiCl}_3$ ,  $\text{SiCl}_4$ ,  $\text{Me}_3\text{SiCl}$ ,  $\text{Me}_3\text{SiBr}$ ,  $\text{Me}_3\text{SiI}$ , benzyl alcohol, hexamethylbenzene and 4-(dimethylamino)pyridine (DMAP) were obtained from Tokyo Chemical Industry Co., Ltd.  $\text{Ph}_2\text{MeSiCl}$  and  $\text{PhMe}_2\text{SiCl}$  were obtained from Gelest, Inc.  $\text{H}_2$  (G1 grade, 99.99999%) was obtained from Taiyo Nippon Sanso Corporation. Benzyloxysilanes except for  $\text{Me}_2\text{Si}(\text{OBn})_2$ ,  $\text{MeSi}(\text{OBn})_3$  and  $\text{Si}(\text{OBn})_4$  were prepared as reported previously.<sup>S1</sup>

All Pd/Cs were dried at 120 °C for 48 h under vacuum. Super dehydrated  $\text{EtOAc}$  and anhydrous  $\text{CDCl}_3$  used in the reaction were degassed by three freeze-pump-thaw cycles.

### Product characterization and determination of the yields except for $\text{Me}_2\text{Si}(\text{OSiMe}_3)_2$ and $\text{MeSi}(\text{OSiMe}_3)_3$

Characterization of products is based on the comparison of their NMR data with reported data or those of commercial products. Yields of the products except for  $\text{Me}_2\text{Si}(\text{OSiMe}_3)_2$  and  $\text{MeSi}(\text{OSiMe}_3)_3$  were determined by integral values of  $^1\text{H}$  NMR analysis by using hexamethylbenzene as an internal standard.

### Determination of the yields for $\text{Me}_2\text{Si}(\text{OSiMe}_3)_2$ and $\text{MeSi}(\text{OSiMe}_3)_3$

Because of volatility of  $\text{Me}_2\text{Si}(\text{OSiMe}_3)_2$  and  $\text{MeSi}(\text{OSiMe}_3)_3$  and overlapping of their Me proton signals with those of by-products in  $^1\text{H}$  NMR spectra, yields of  $\text{Me}_2\text{Si}(\text{OSiMe}_3)_2$  and  $\text{MeSi}(\text{OSiMe}_3)_3$

were determined by integral values of  $^{29}\text{Si}$  NMR signals using inverse-gated decoupling pulse sequence with 1,4-bis(trimethylsilyl)benzene as an internal standard. To ensure quantitative analysis by  $^{29}\text{Si}$  NMR, samples were dissolved in  $\text{CDCl}_3$  with a trace amount of  $\text{Cr}(\text{acac})_3$  as a relaxation agent. At the beginning of the study, we confirmed that the pulse delay time 10 sec is sufficient to quantify the product yields by measuring the  $^{29}\text{Si}$  NMR spectra with various pulse delay time 2, 10, 20, 40 and 80 sec for the commercial product of  $\text{Me}_2\text{Si}(\text{OSiMe}_3)_2$  (Figure S1). From this result, 10 sec was adopted as pulse delay time for quantitative analysis.

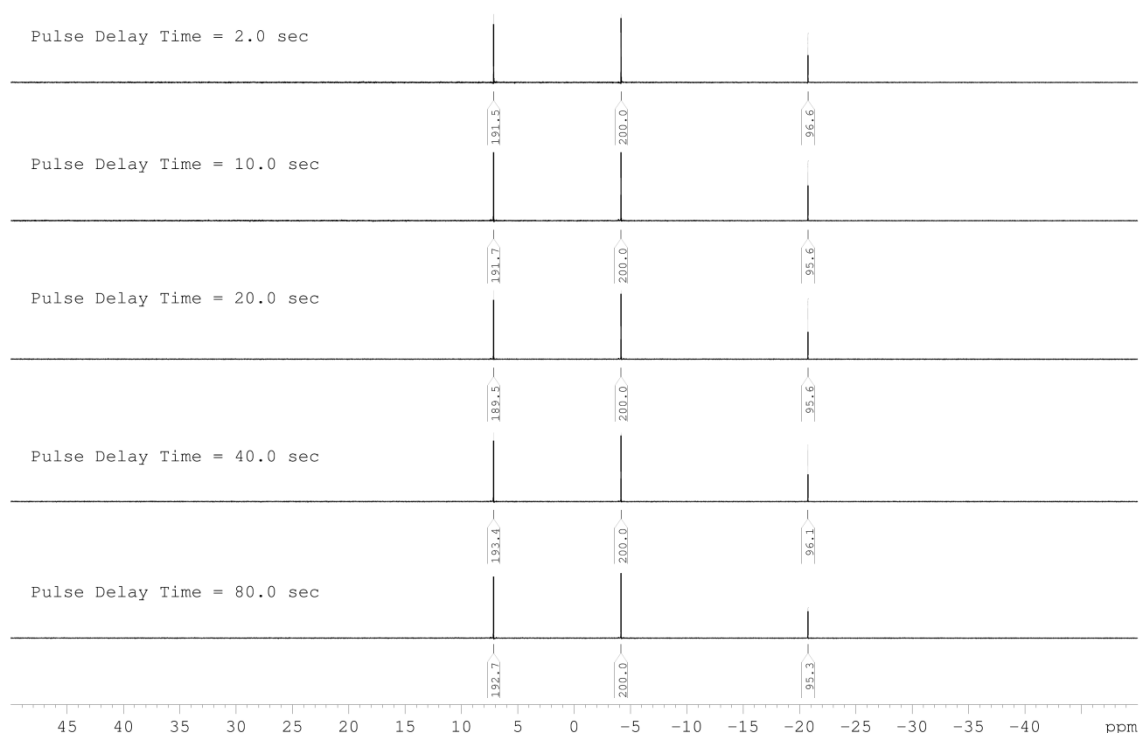

Figure S1.  $^{29}\text{Si}$  NMR spectra of a mixture of  $\text{Me}_2\text{Si}(\text{OSiMe}_3)_2$  and 1,4-bis(trimethylsilyl)benzene with various relaxation delay times (small amount of  $\text{Cr}(\text{acac})_3$  was added as a relaxation agent).

#### Typical procedure for the synthesis of benzyloxsilanes.<sup>S1</sup>

As an example, synthesis of  $\text{Me}_2\text{Si}(\text{OBn})_2$ <sup>S2</sup> are shown below.

To a solution of benzyl alcohol (66.5 g, 615 mmol),  $\text{Et}_3\text{N}$  (62.2 g, 615 mmol) and DMAP (183 mg, 1.50 mmol) in  $\text{CH}_2\text{Cl}_2$  (500 mL) was added  $\text{Me}_2\text{SiCl}_2$  (38.7 g, 300 mmol) dropwise under  $\text{N}_2$  atmosphere. After the mixture was stirred at room temperature for 24 h, it was diluted with hexane (700 mL), washed with water to remove triethylamine hydrochloride, DMAP, residual benzyl alcohol and  $\text{Et}_3\text{N}$  and dried over  $\text{Na}_2\text{SO}_4$ . The solvent was removed under reduced pressure, and the residue was purified by Kugelrohr distillation (6 Pa, oven temp. 120 °C) to give  $\text{Me}_2\text{Si}(\text{OBn})_2$  65.6 g (80% yield) as a colorless oil.

$^1\text{H}$  NMR ( $\text{CDCl}_3$ ,  $\delta$ ) 0.22 (s, 6H, Me), 4.77 (s, 4H,  $-\text{OCH}_2$ ), 7.2–7.4 (m, 10H, Ph);  $^{13}\text{C}$  NMR ( $\text{CDCl}_3$ ,  $\delta$ ) – 3.0, 64.5, 126.6, 127.2, 128.3, 140.5;  $^{29}\text{Si}$  NMR ( $\text{CDCl}_3$ ,  $\delta$ ) –1.2; HRMS  $m/z$  calcd for  $\text{C}_{16}\text{H}_{20}\text{O}_2\text{SiNa}$  295.1125 [ $M + \text{Na}$ ] $^+$ , found 295.1127.

#### **MeSi(OBn) $_3$** <sup>S3</sup>

The typical procedure was followed by using MeSiCl $_3$  (29.9 g, 200 mmol), benzyl alcohol (66.0 g, 610 mmol), Et $_3$ N (61.7 g, 610 mmol) and DMAP (244 mg, 2.00 mmol). The crude mixture was purified by Kugelrohr distillation (6 Pa, oven temp. 173 °C) to afford MeSi(OBn) $_3$  (66.3 g, 91% yield) as a colorless oil.

$^1\text{H}$  NMR ( $\text{CDCl}_3$ ,  $\delta$ ) 0.22 (s, 3H, Me), 4.84 (s, 6H,  $-\text{OCH}_2$ ), 7.3–7.4 (m, 15H, Ph);  $^{13}\text{C}$  NMR ( $\text{CDCl}_3$ ,  $\delta$ ) – 6.8, 64.7, 126.7, 127.3, 128.3, 140.2;  $^{29}\text{Si}$  NMR ( $\text{CDCl}_3$ ,  $\delta$ ) –41.3; HRMS  $m/z$  calcd for  $\text{C}_{22}\text{H}_{24}\text{O}_3\text{SiNa}$  387.1387 [ $M + \text{Na}$ ] $^+$ , found 387.1381.

#### **Si(OBn) $_4$** <sup>S4</sup>

The typical procedure was followed by using SiCl $_4$  (3.50 g, 20.6 mmol), benzyl alcohol (9.27 g, 86.5 mmol), Et $_3$ N (8.76 g, 86.5 mmol) and DMAP (403 mg, 3.30 mmol). The crude mixture was purified by Kugelrohr distillation (10 Pa, oven temp. 200 °C) to afford Si(OBn) $_4$  (4.21 g, 45% yield) as a colorless solid.

$^1\text{H}$  NMR ( $\text{CDCl}_3$ ,  $\delta$ ) 4.79 (s, 8H,  $-\text{OCH}_2$ ), 7.1–7.4 (m, 20H, Ph);  $^{13}\text{C}$  NMR ( $\text{CDCl}_3$ ,  $\delta$ ) 65.5 ( $-\text{CH}_2\text{Ph}$ ), 126.7, 127.3, 128.2, 139.7;  $^{29}\text{Si}$  NMR ( $\text{CDCl}_3$ ,  $\delta$ ) –80.7; HRMS  $m/z$  calcd for  $\text{C}_{28}\text{H}_{28}\text{O}_4\text{SiNa}$  479.1649 [ $M + \text{Na}$ ] $^+$ , found 479.1633.

#### **General procedure for cross-coupling reaction of benzyloxysilanes with Me $_3$ SiCl.**

To a stirred mixture of a benzyloxysilane (200 mg), Pd/C (10 mol% of Pd for the total amounts of benzyl group) in EtOAc (6.0 mL) was added 2 equivalents of Me $_3$ SiCl under Ar atmosphere at room temperature. The resulting mixture was stirred for an appropriate time and then filtered through a membrane filter (GE Healthcare Puradisc 13, 0.45  $\mu\text{m}$ ). After the removal of the solvent,  $\text{CDCl}_3$ , hexamethylbenzene (internal standard) and a trace amount of Cr(acac) $_3$  (relaxation agent) were added to the filtrate. The conversion and the yield were determined by  $^1\text{H}$  NMR analysis of the crude mixture. For Me $_2$ Si(OSiMe $_3$ ) $_2$  and MeSi(OSiMe $_3$ ) $_3$ , the yields were determined by  $^{29}\text{Si}$  NMR analysis as mentioned above.

#### **Ph $_3$ SiOSiMe $_3$** <sup>S5</sup>

The general procedure was followed by using Ph $_3$ SiOBn (201 mg, 0.548 mmol), Pd/C (58.0 mg, 0.05 mmol) and Me $_3$ SiCl (119 mg, 1.09 mmol). After stirring for 9 h, the mixture was analyzed by  $^1\text{H}$  NMR showing the formation of Ph $_3$ SiOSiMe $_3$  in 96% yield.

$^1\text{H}$  NMR ( $\text{CDCl}_3$ ,  $\delta$ ) 0.11 (s, 9H, Me), 7.36–7.60 (m, 15H, Ph);  $^{13}\text{C}$  NMR ( $\text{CDCl}_3$ ,  $\delta$ ) 2.04 (Me), 127.7, 129.7, 135.0, 136.2;  $^{29}\text{Si}$  NMR ( $\text{CDCl}_3$ ,  $\delta$ ) –21.6, 10.8; HRMS  $m/z$  calcd for 371.1258 [ $M + \text{Na}$ ] $^+$ , found 371.1265.

#### **$\text{Ph}_2^t\text{BuSiOSiMe}_3$ <sup>S6</sup>**

The general procedure was followed by using  $\text{Ph}_2^t\text{BuSiOBn}$  (0.201 g, 0.580 mmol), Pd/C (62.0 mg, 0.058 mmol) and  $\text{Me}_3\text{SiCl}$  (129 mg, 1.19 mmol). After stirring for 72 h, the mixture was analyzed by  $^1\text{H}$  NMR showing the formation of  $\text{Ph}_2^t\text{BuSiOSiMe}_3$  in 65% yield.

$^1\text{H}$  NMR ( $\text{CDCl}_3$ ,  $\delta$ ) 0.18 (s, 9H,  $\text{Si}(\text{CH}_3)_3$ ), 1.07 (s, 9H,  $\text{C}(\text{CH}_3)_3$ ) 7.36–7.80 (m, 10H, Ph);  $^{13}\text{C}$  NMR ( $\text{CDCl}_3$ ,  $\delta$ ) 2.3 ( $\text{Si}(\text{CH}_3)_3$ ), 19.4, 26.9, 127.6, 129.4, 135.1, 136.2;  $^{29}\text{Si}$  NMR ( $\text{CDCl}_3$ ,  $\delta$ ) –12.6, 8.9; HRMS  $m/z$  calcd for 329.1751 [ $M + \text{Na}$ ] $^+$ , found 329.1743.

#### **$\text{Ph}_2\text{MeSiOSiMe}_3$ <sup>S5</sup>**

The general procedure was followed by using  $\text{Ph}_2\text{MeSiOBn}$  (0.201 g, 0.66 mmol), Pd/C (70.0 mg, 0.066 mmol) and  $\text{Me}_3\text{SiCl}$  (146 mg, 1.35 mmol). After stirring for 9 h, the mixture was analyzed by  $^1\text{H}$  NMR showing the formation of  $\text{Ph}_2\text{MeSiOSiMe}_3$  in 74% yield.

$^1\text{H}$  NMR ( $\text{CDCl}_3$ ,  $\delta$ ) 0.21 (s, 9H,  $\text{SiMe}_3$ ), 0.71 (s, 3H,  $\text{SiPh}_2\text{Me}$ ) 7.40–7.66 (m, 10H, Ph);  $^{13}\text{C}$  NMR ( $\text{CDCl}_3$ ,  $\delta$ ) –0.3 ( $\text{SiMe}_3$ ), 2.2 ( $\text{SiPh}_2\text{Me}$ ), 127.8, 129.6, 134.0, 138.3;  $^{29}\text{Si}$  NMR ( $\text{CDCl}_3$ ,  $\delta$ ) –12.2 ( $\text{SiPh}_2\text{Me}$ ), 10.0 ( $\text{SiMe}_3$ ); HRMS  $m/z$  calcd for 309.1101 [ $M + \text{Na}$ ] $^+$ , found 309.1113.

#### **$\text{PhMe}_2\text{SiOSiMe}_3$ <sup>S5</sup>**

The general procedure was followed by using  $\text{PhMe}_2\text{SiOBn}$  (0.200 g, 0.825 mmol), Pd/C (0.089 g, 0.084 mmol) and  $\text{Me}_3\text{SiCl}$  (181 mg, 1.66 mmol). After stirring for 9 h, the mixture was analyzed by  $^1\text{H}$  NMR showing the formation of  $\text{PhMe}_2\text{SiOSiMe}_3$  in 54% yield.

$^1\text{H}$  NMR ( $\text{CDCl}_3$ ,  $\delta$ ) 0.13 (s, 9H,  $\text{SiMe}_3$ ), 0.38 (s, 6H,  $\text{SiPhMe}_2$ ), 7.33–7.58 (m, 5H, Ph);  $^{13}\text{C}$  NMR ( $\text{CDCl}_3$ ,  $\delta$ ) 1.5 ( $\text{SiMe}_3$ ), 2.5 ( $\text{SiPhMe}_2$ ), 128.7, 129.6, 133.9, 139.0;  $^{29}\text{Si}$  NMR ( $\text{CDCl}_3$ ,  $\delta$ ) –1.9, 9.0; HRMS  $m/z$  calcd for 247.0945 [ $M + \text{Na}$ ] $^+$ , found 247.0946.

#### **$\text{Ph}_2\text{Si}(\text{OSiMe}_3)_2$ <sup>S7</sup>**

The general procedure was followed by using  $\text{Ph}_2\text{Si}(\text{OBn})_2$  (0.200 g, 0.504 mmol), Pd/C (107 mg, 0.101 mmol) and  $\text{Me}_3\text{SiCl}$  (219 mg, 2.02 mmol). After stirring for 5 h, the mixture was analyzed by  $^1\text{H}$  NMR showing the formation of  $\text{Ph}_2\text{Si}(\text{OSiMe}_3)_2$  in 92% yield.

$^1\text{H}$  NMR ( $\text{CDCl}_3$ ,  $\delta$ ) 0.22 (s, 18H, Me), 7.4–7.7 (m, 10H, Ph);  $^{13}\text{C}$  NMR ( $\text{CDCl}_3$ ,  $\delta$ ) 2.1 (Me), 127.7, 129.8, 134.3, 136.8;  $^{29}\text{Si}$  NMR ( $\text{CDCl}_3$ ,  $\delta$ ) –47.3 ( $\text{Ph}_2\text{Si}(\text{OSiMe}_3)_2$ ), 9.8 ( $\text{OSiMe}_3$ ); HRMS  $m/z$  calcd for 361.1470 [ $M + \text{Na}$ ] $^+$ , found 361.1477.

### **Me<sub>2</sub>Si(OSiMe<sub>3</sub>)<sub>2</sub>**<sup>S8</sup>

The general procedure was followed by using Me<sub>2</sub>Si(OBn)<sub>2</sub> (0.203 g, 0.745 mmol), Pd/C (0.157 g, 0.148 mmol) and Me<sub>3</sub>SiCl (318 mg, 2.93 mmol). After stirring for 9 h, the mixture was analyzed by <sup>29</sup>Si NMR showing the formation of Me<sub>2</sub>Si(OSiMe<sub>3</sub>)<sub>2</sub> in 54% yield.

<sup>1</sup>H NMR (CDCl<sub>3</sub>, δ) 0.09 (s, 6H, SiMe<sub>2</sub>), 0.16 (s, 18H, OSiMe<sub>3</sub>); <sup>13</sup>C NMR (CDCl<sub>3</sub>, δ) 0.2 (SiMe<sub>2</sub>), 0.8 (OSiMe<sub>3</sub>); <sup>29</sup>Si NMR (CDCl<sub>3</sub>, δ) -21.5 (SiMe<sub>2</sub>), 6.5 (OSiMe<sub>3</sub>).

### **PhSi(OSiMe<sub>3</sub>)<sub>3</sub>**<sup>S9</sup>

The general procedure was followed by using PhSi(OBn)<sub>3</sub> (0.200 g, 0.469 mmol), Pd/C (0.141 g, 0.133 mmol) and Me<sub>3</sub>SiCl (306 mg, 2.81 mmol). After stirring for 9 h, the mixture was analyzed by <sup>1</sup>H NMR showing the formation of PhSi(OSiMe<sub>3</sub>)<sub>3</sub> in 89% yield.

<sup>1</sup>H NMR (CDCl<sub>3</sub>, δ) 0.23 (s, 27H, Me), 7.2–7.4 (m, 5H, Ph); <sup>13</sup>C NMR (CDCl<sub>3</sub>, δ) 1.9 (Me), 127.6, 129.6, 133.9, 135.6; <sup>29</sup>Si NMR (CDCl<sub>3</sub>, δ) -77.7 ((Me<sub>3</sub>SiO)<sub>3</sub>Si), 8.9 (OSiMe<sub>3</sub>); HRMS *m/z* calcd for 373.1501 [*M* + Na]<sup>+</sup>, found 373.1499.

### **MeSi(OSiMe<sub>3</sub>)<sub>3</sub>**<sup>S10</sup>

The general procedure was followed by using MeSi(OBn)<sub>3</sub> (0.201 g, 0.551 mmol), Pd/C (0.176 g, 0.165 mmol) and Me<sub>3</sub>SiCl (357 mg, 3.29 mmol). After stirring for 3 h, the mixture was analyzed by <sup>29</sup>Si NMR showing the formation of MeSi(OSiMe<sub>3</sub>)<sub>3</sub> in 88% yield.

<sup>1</sup>H NMR (CDCl<sub>3</sub>, δ) 0.00 (s, 3H, SiMe), 0.07 (s, 27H, OSiMe<sub>3</sub>); <sup>13</sup>C NMR (CDCl<sub>3</sub>, δ) -3.2 (SiMe), 0.7 (OSiMe<sub>3</sub>); <sup>29</sup>Si NMR (CDCl<sub>3</sub>, δ) -64.9 (SiMe), 6.9 (OSiMe<sub>3</sub>); HRMS *m/z* calcd for 318.0929 [*M* - Me + Na]<sup>+</sup>, found 318.0933.

### **Si(OSiMe<sub>3</sub>)<sub>4</sub>**<sup>S10</sup>

The general procedure was followed by using Si(OBn)<sub>4</sub> (0.202 g, 0.442 mmol), Pd/C (0.187 g, 0.176 mmol) and Me<sub>3</sub>SiCl (384 mg, 3.54 mmol). After stirring for 6 h, the mixture was analyzed by <sup>1</sup>H NMR showing the formation of Si(OSiMe<sub>3</sub>)<sub>4</sub> in 93% yield.

<sup>1</sup>H NMR (CDCl<sub>3</sub>, δ) 0.18 (s, 54H, Me); <sup>13</sup>C NMR (CDCl<sub>3</sub>, δ) 1.5 (Me); <sup>29</sup>Si NMR (CDCl<sub>3</sub>, δ) -104.6 ((Me<sub>3</sub>SiO)<sub>3</sub>Si), 8.4 (OSiMe<sub>3</sub>); HRMS *m/z* calcd for 407.1359 [*M* + Na]<sup>+</sup>, found 407.1352.

### **Large scale synthesis of Ph<sub>3</sub>SiOSiMe<sub>3</sub>**

A mixture of Ph<sub>3</sub>SiOBn (10.0 g, 27.3 mmol), Pd/C (2.91 g, 2.73 mmol) and Me<sub>3</sub>SiCl (5.93 g, 54.6 mmol) in EtOAc (500 mL) was stirred at room temperature for 1 week. The reaction mixture was then concentrated under reduced pressure to remove residual Me<sub>3</sub>SiCl, and then Pd/C was filtered through Hyflo Super Cel using ethyl acetate as a solvent. Then the solution was concentrated under reduced pressure and the residue was purified by Kugelrohr distillation (8 Pa, oven temp. 140 °C) to give **2** (8.93 g,

94%) as a colorless solid.

- S1. M. Igarashi, T. Matsumoto, K. Sato, W. Ando and S. Shimada, *Chem. Lett.*, 2014, in press.
- S2. (a) A. Wright and R. West, *J. Am. Chem. Soc.*, 1974, **96**, 3214; (b) R. J. P. Corriu, D. Leclercq, P. H. Mutin, H. Samson and A. Vioux, *J. Organomet. Chem.*, 1994, **466**, 43.
- S3. S. Bienz and A. Chapeaurouge, *Helv. Chim. Acta.*, 1991, **74**, 1477.
- S4. A. Y. Khalimon, R. Simionescu and G. I. Nikonov, *J. Am. Chem. Soc.*, 2011, **133**, 7033.
- S5. R. Arias-Ugarte, H. K. Sharma, A. L. C. Morris and K. H. Pannell, *J. Am. Chem. Soc.*, 2012, **134**, 848.
- S6. I. W. J. Still and W. Daoquan, *Phosphorus, Sulfur Silicon Relat. Elem.*, 1991, **62**, 83.
- S7. (a) R. E. Swaim and W. P. Weber, *J. Am. Chem. Soc.*, 1979, **101**, 5703; (b) R. Keyrouz and V. Jouikov, *New J. Chem.*, 2003, **27**, 902.
- S8. D. S. Fattakhova, V. V. Jouikov and M. G. Voronkov, *J. Organomet. Chem.*, 2000, **613**, 170.
- S9. S. D. Korkin, M. I. Buzin, E. V. Matukhina, L. N. Zherlitsyna, N. Auner and O. I. Shchegolikhina, *J. Organomet. Chem.*, 2003, **686**, 313.
- S10. G. Engelhardt, H. Jancke, M. Mägi, T. Pehk and E. Lippmaa, *J. Organomet. Chem.*, 1971, **28**, 293.
